# Supplementary material for: A double-threshold score of serum pepsinogen combined with serum albumin improves the screening ability of peptic ulcer
Source: Research Square preprint supplement (doi:10.21203/rs.3.rs-2312636/v1), 2022-12-28
Supplement: Supplementary file 1 [file 625b1975fe8c2f4f3d04054f.docx]

**Supplemental table I** Comparison of GU and non-GU patients

| Variables | GU | Non-GU | P value | Adjusted OR | 95%CI | P value |
| --- | --- | --- | --- | --- | --- | --- |
| No of subjects | 89 | 813 |  |  |  |  |
| Male, n (%) | 72（80.9） | 396（48.7） | <0.001 | 0.303 | 0.169-0.543 | 0.001 |
| Age, mean (SD), y | 58.4±13.4 | 53.3±12.3 | <0.001 | - | - | - |
| Hypertension, n (%) | 40（44.9） | 242（29.8） | 0.003 | 0.577 | 0.352-0.946 | 0.029 |
| Diabetes, n (%) | 8（9.0） | 48（5.9） | 0.252 | - | - | - |
| Stroke, n (%) | 4（4.5） | 5（0.6） | 0.003 | - | - | - |
| Antiplatelet use, n (%) | 5（5.6） | 17（2.1） | 0.041 | - | - | - |
| Anticoagulant use, n (%) | 0（0.0） | 2（0.2） | 1 | - | - | - |
| Anti-inflammatory drugs use, n (%) | 6（6.7） | 9（1.1） | <0.001 | 0.278 | 0.082-0.944 | 0.04 |
| Leukocyte, mean (SD), 109/L | 7.08±3.56 | 5.73±1.94 | 0.001 | - | - | - |
| Red blood cells, mean (SD), 1012/L | 4.08±0.80 | 4.54±0.65 | <0.001 | - | - | - |
| Platelets, mean (SD), 109/L | 206.89±86.43 | 197.32±57.09 | 0.316 | - | - | - |
| PT, mean (SD), s | 12.01±1.15 | 11.55±0.90 | <0.001 | - | - | - |
| APTT, mean (SD), s | 31.63±4.03 | 32.09±3.48 | 0.251 | - | - | - |
| INR, mean (SD), | 1.10±0.11 | 1.05±0.08 | <0.001 | - | - | - |
| ALT, mean (SD), U/L | 21.46±21.53 | 24.80±24.76 | 0.222 | - | - | - |
| GLB, mean (SD), g/L | 24.15±5.62 | 26.92±4.23 | <0.001 | - | - | - |
| ALB, mean (SD), g/L | 38.34±6.20 | 42.73±4.45 | <0.001 | 0.871 | 0.832-0.911 | <0.001 |
| Serum calcium, mean (SD), mmol/L | 2.14±0.15 | 2.31±2.56 | 0.54 | - | - | - |
| PG I, mean (SD), μg/L | 209.13±105.30 | 142.51±80.55 | <0.001 | 1.005 | 1.002-1.007 | <0.001 |
| PG II, mean (SD), μg/L | 17.96±13.64 | 11.71±10.60 | <0.001 | - | - | - |
| PG I/II, mean (SD) | 14.93±8.88 | 15.19±7.13 | 0.754 | - | - | - |
| GP-17, mean (SD), pmol/L | 15.18±17.79 | 9.70±14.73 | 0.006 | - | - | - |
| HP antibody positive, n (%) | 17（19.1） | 160（19.7） | 0.896 | - | - | - |

GU, Gastric ulcer; OR, odds ratio; CI, confidence interval; SD, standard deviation; RBC, red blood cell; PT, prothrombin time; APTT, active partial thromboplastin time; INR, international standard ratio; ALT, alanine aminotransferase; GLB, globulin; ALB, albumin; PG I, pepsinogen I; PG II, pepsinogen II; G-17, gastrin-17; HP, helicobacter pylori.

**Supplemental table II** Comparison of DU and non-DU patients

| Variables | DU | Non-DU | P value | Adjusted OR | 95%CI | P value |
| --- | --- | --- | --- | --- | --- | --- |
| No of subjects | 133 | 769 |  |  |  |  |
| Male, n (%) | 95（71.4） | 373（48.5） | ＜0.001 | - | - | - |
| Age, mean (SD), y | 52.3±15.0 | 54.1±12.0 | 0.199 | - | - | - |
| Hypertension, n (%) | 45（33.8） | 237（30.8） | 0.489 | - | - | - |
| Diabetes, n (%) | 8（6.0） | 48（6.2） | 0.92 | - | - | - |
| Storke, n (%) | 2（1.5） | 7（1.0） | 0.87 | - | - | - |
| Antiplatelet use, n (%) | 8（6.0） | 14（1.8） | 0.004 | 0.337 | 0.116-0.978 | 0.045 |
| Anticoagulant use, n (%) | 0（0.0） | 2（0.3） | 1 | - | - | - |
| Anti-inflammatory drugs use, n (%) | 5（3.8） | 10（1.3） | 0.041 | - | - | - |
| Leukocyte, mean (SD), 109/L | 6.75±2.37 | 5.71±2.11 | ＜0.001 | - | - | - |
| Red blood cells, mean (SD), 1012/L | 4.11±0.95 | 4.57±0.59 | ＜0.001 | - | - | - |
| Platelets, mean (SD), 109/L | 202.72±66.16 | 197.48±59.55 | 0.359 | - | - | - |
| PT, mean (SD), s | 11.97±1.03 | 11.53±0.91 | ＜0.001 | - | - | - |
| APTT, mean (SD), s | 31.16±3.62 | 32.20±3.50 | 0.002 | - | - | - |
| INR, mean (SD), | 1.09±0.10 | 1.05±0.08 | ＜0.001 | 16.92 | 1.352-211.802 | 0.028 |
| ALT, mean (SD), U/L | 23.37±26.62 | 24.66±24.08 | 0.58 | - | - | - |
| GLB, mean (SD), g/L | 23.71±5.07 | 27.15±4.15 | ＜0.001 | 0.873 | 0.829-0.918 | 0.001 |
| ALB, mean (SD), g/L | 39.31±5.47 | 42.81±4.53 | ＜0.001 | 0.935 | 0.892-0.979 | 0.005 |
| Serum calcium, mean (SD), mmol/L | 2.15±0.15 | 2.31±2.63 | 0.467 | - | - | - |
| PG I, mean (SD), μg/L | 202.20±94.16 | 139.90±80.60 | ＜0.001 | 1.01 | 1.006-1.013 | <0.001 |
| PG II, mean (SD), μg/L | 17.24±12.88 | 11.47±10.53 | ＜0.001 | 0.964 | 0.935-0.994 | 0.018 |
| PG I/II, mean (SD) | 13.95±12.88 | 11.47±1.44 | 0.017 | 0.92 | 0.873-0.969 | 0.002 |
| GP-17, mean (SD), pmol/L | 10.43±6.02 | 15.37±7.50 | 0.464 | - | - | - |
| HP antibody positive, n(%) | 42（31.5） | 135（17.6） | ＜0.001 | 0.356 | 0.217-0.582 | <0.001 |

GU, Gastric ulcer; OR, odds ratio; CI, confidence interval; SD, standard deviation; RBC, red blood cell; PT, prothrombin time; APTT, active partial thromboplastin time; INR, international standard ratio; ALT, alanine aminotransferase; GLB, globulin; ALB, albumin; PG I, pepsinogen I; PG II, pepsinogen II; G-17, gastrin-17; HP, helicobacter pylori.
